# Supplementary material for: Phenotypic and Genotypic Characterization of Cutibacterium acnes Isolated from Shoulder Surgery Reveals Insights into Genetic Diversity
Source: MDPI journal article supplement (doi:10.3390/microorganisms11102594), 2023-10-20
Supplement: s1 [file s1]

# SUPPLEMENT MATERIAL

Table S1. Susceptibility antibiotics using MIC test for 27 isolates of *C. acnes*.

| Samples identification | TX     | VAN   | PEN    | RIF    | LZD   | DAP   | CLI    | MTZ  | CIP  | AC              |
|------------------------|--------|-------|--------|--------|-------|-------|--------|------|------|-----------------|
| 4.3                    | <0.016 | 0.125 | 0.04   | <0.002 | 0.03  | 0.047 | 1      | >256 | 0.5  | <0.016          |
| 6.1                    | <0.016 | 0.38  | <0.016 | 0.008  | 0.18  | 0.19  | 0.047  | >256 | 1    | <0.016          |
| 6.3                    | -      | -     | -      | -      | -     | -     | -      | -    | -    | -               |
| 7.1                    | <0.016 | 0.5   | <0.016 | <0.002 | 0.5   | 0.19  | <0.016 | >256 | 0.5  | <0.016          |
| 8.2                    | 0.023  | 0.5   | <0.016 | <0.002 | 0.5   | 0.23  | 0.032  | >256 | 1    | <0.016          |
| 8.3                    | 0.032  | 0.25  | <0.016 | 0.006  | 0.12  | 0.19  | <0.016 | >256 | 1.5  | <0.016          |
| 17.2                   | <0.016 | 0.19  | <0.016 | <0.002 | 0.09  | 0.125 | <0.016 | >256 | 1    | <0.016          |
| 17.3                   | <0.016 | 0.75  | <0.016 | <0.002 | 0.09  | 0.19  | <0.016 | >256 | 1    | <0.016          |
| 18.2                   | <0.016 | 0.94  | <0.016 | 0.25   | 0.12  | 0.38  | <0.016 | >256 | 0.5  | <0.016          |
| 22.3                   | <0.016 | 0.25  | <0.016 | >32    | 0.12  | 0.5   | <0.016 | >256 | 0.75 | <0.016          |
| 26.2                   | <0.016 | 0.25  | <0.016 | <0.002 | 0.12  | 0.125 | <0.016 | >256 | 1    | <0.016          |
| 29.1                   | <0.016 | 0.5   | <0.016 | 0.006  | 0.09  | 0.19  | <0.016 | >256 | 0.5  | <0.016          |
| 29.2                   | <0.016 | 0.25  | <0.016 | <0.002 | 0.12  | 0.19  | <0.016 | >256 | 0.75 | <0.016          |
| 29.3                   | <0.016 | 0.19  | <0.016 | <0.002 | 0.375 | 0.19  | 0.032  | >256 | 0.5  | <0.016          |
| 30.3                   | <0.016 | 0.125 | <0.016 | <0.002 | 0.06  | 0.064 | 0.25   | >256 | >32  | <0.016          |
| 33.2                   | <0.016 | 0.19  | 0.003  | <0.002 | 0.25  | 0.094 | 1      | >256 | 0.5  | <0.016          |
| 34.2                   | 0.23   | 0.38  | <0.016 | 0.008  | 0.12  | 0.19  | <0.016 | >256 | 0.75 | 0.064           |
| 34.3                   | 0.094  | 0.5   | 0.23   | <0.002 | 0.25  | 0.19  | 0.094  | >256 | 1    | 0.094           |
| 37.1                   | <0.016 | 0.25  | <0.016 | 0.008  | 0.18  | 0.19  | 0.5    | >256 | 0.75 | <0.016          |
| 42.1                   | 0.094  | 1     | <0.016 | 0.003  | 0.5   | 0.25  | 0.47   | >256 | 0.5  | <0.016          |
| 42.2                   | 0.125  | 0.5   | 0.64   | 0.008  | 0.25  | 0.25  | 0.47   | >256 | 0.75 | <0.016          |
| 48.3                   | <0.016 | 0.38  | <0.016 | <0.002 | 0.03  | 0.25  | <0.016 | >256 | 0.5  | <0.016          |
| 49.2                   | 0.125  | 0.38  | 0.023  | 0.008  | 0.25  | 0.25  | 0.064  | >256 | 1.5  | 0.032           |
| 55.1                   | 0.064  | 0.50  | <0.016 | 0.008  | 0.5   | 0.19  | 0.094  | >256 | 0.5  | <0.016          |
| 57.1                   | <0.016 | 0.25  | 0.003  | 0.004  | 0.5   | 0.19  | <0.016 | >256 | 0.25 | <0.016          |
| 64.1                   | <0.016 | 0.64  | <0.016 | <0.002 | 0.03  | 0.064 | <0.016 | >256 | 1.5  | <0.016          |
| 74.1                   | <0.016 | 0.125 | <0.016 | <0.002 | 0.03  | 0.19  | 0.019  | >256 | 1    | <0.016          |
| 76.1                   | -      | -     | -      | -      | -     | -     | -      | -    | -    | -               |
| 81.2                   | <0.016 | 0.047 | <0.016 | <0.002 | 0.03  | 0.19  | <0.016 | >256 | 0.5  | <0.016          |
| 83.3                   | -      | -     | -      | -      | -     | -     | -      | -    | -    | -               |
| BRCAST                 |        |       |        |        |       |       |        |      |      |                 |
| S                      | -      | ≤2    | ≤0.25  | -      | -     | -     | ≤4     | ≤4   | -    | ≤4 <sup>4</sup> |
| I                      | -      | -     | 0.5    | -      | -     | -     | -      | -    | -    | 8               |

|             |     |    |      |   |   |   |    |     |   |                 |
|-------------|-----|----|------|---|---|---|----|-----|---|-----------------|
| R           | -   | >2 | >0.5 | - | - | - | >4 | >4  | - | >8 <sup>4</sup> |
| <b>CLSI</b> |     |    |      |   |   |   |    |     |   |                 |
| S           | ≤16 | -  | ≤0.5 | - | - | - | ≤2 | ≤8  | - | ≤4/2            |
| I           | 32  | -  | 1    | - | - | - | 4  | 16  | - | 8/4             |
| R           | ≥64 | -  | ≥2   | - | - | - | >8 | >32 | - | ≥16/8           |

MIC= minimal inhibitory concentration, TX = Ceftriaxone, VAN = Vancomycin, PEN = Penicillin, RIF = Rifampicin, LZD = Linezolid, DAP = Daptomycin, CLI = Clindamycin, MTZ = Metronidazole, CIP = Ciprofloxacin, AC = Clavulanic acid/Amoxicillin.

Table S2. List of core and accessory genes with its specific role found in the *C. acnes* genomes.

[illegible]

|                        |                                                                                            |                                                                    |
|------------------------|--------------------------------------------------------------------------------------------|--------------------------------------------------------------------|
| <b>inhA,<br/>fabI</b>  | Enoyl-[acyl-carrier-protein]<br>reductase [NADH] (EC 1.3.1.9)                              | Antibiotic target in susceptible species                           |
| <b>rpoB</b>            | DNA-directed RNA polymerase<br>beta subunit (EC 2.7.7.6)                                   | Antibiotic target in susceptible species                           |
| <b>Alr</b>             | Alanine racemase (EC 5.1.1.1)                                                              | Antibiotic target in susceptible species                           |
| <b>folP</b>            | Dihydropteroate synthase (EC<br>2.5.1.15)                                                  | Antibiotic target in susceptible species                           |
| <b>rho</b>             | Transcription termination factor<br>Rho                                                    | Antibiotic target in susceptible species                           |
| <b>EF-Tu</b>           | Translation elongation factor Tu                                                           | Antibiotic target in susceptible species                           |
| <b>S10p</b>            | SSU ribosomal protein S10p<br>(S20e)                                                       | Antibiotic target in susceptible species                           |
| <b>rpsL</b>            | SSU ribosomal protein S12p<br>(S23e)                                                       | Aminoglycoside resistance gene                                     |
| <b>recA</b>            | Adenosine-5'-Diphosphate<br>Monothiophosphate;2'-<br>Deoxyadenosine 5'-Triphosphate        | Drug target                                                        |
| <b>gidB</b>            | 16S rRNA (guanine(527)-N(7))-<br>methyltransferase (EC 2.1.1.170)                          | Gene conferring resistance via absence                             |
| <b>GdpD</b>            | Glycerophosphoryl diester<br>phosphodiesterase (EC 3.1.4.46)                               | Protein altering cell wall charge conferring antibiotic resistance |
| <b>PgsA</b>            | CDP-diacylglycerol--glycerol-3-<br>phosphate 3-<br>phosphatidyltransferase (EC<br>2.7.8.5) | Protein altering cell wall charge conferring antibiotic resistance |
| <b>TadB</b>            | Flp pilus                                                                                  | Flp pilus assembly protein                                         |
| <b>ATPase<br/>CpaF</b> | Flp pilus                                                                                  | Flp pilus assembly protein                                         |
| <b>CAMP</b>            | cAMP-binding proteins                                                                      | cAMP-binding proteins                                              |
| <b>LuxS</b>            | Autoinducer-2 production protein                                                           | Virulence factor                                                   |

|              |                                                  |                                                                         |
|--------------|--------------------------------------------------|-------------------------------------------------------------------------|
| <b>deoR</b>  | Health-associated strains.                       | Virulence factor                                                        |
| <b>ytpA</b>  | Lysophospholipase                                | Virulence factor                                                        |
| <b>clpS</b>  | ATP-dependent Clp protease adaptor protein ClpS  | Targets specific proteins for destruction in prokaryotes and eukaryotes |
| <b>dppB</b>  | ABC transporter                                  | Bacterial growth                                                        |
| <b>gntK</b>  | Shikimate kinase                                 | Precursor of aromatic amino acids and secondary metabolites             |
| <b>HtaA</b>  | Iron acquisition protein                         | Putative virulence factor genes                                         |
| <b>DnaK</b>  | Heat shock proteins                              | Putative virulence factor genes                                         |
| <b>DnaJ</b>  | Heat shock proteins                              | Putative virulence factor genes                                         |
| <b>GroEL</b> | Heat shock proteins                              | Putative virulence factor genes                                         |
| <b>hyl</b>   | Hyaluronate lyase                                | Putative virulence factor genes                                         |
| <b>DsAs</b>  | Dermatan-sulfate adhesins                        | Putative virulence factor genes                                         |
| <b>PNAG</b>  | poly- $\beta$ (1-6)- <i>N</i> -acetylglucosamine | Biofilm formation                                                       |
| <b>EF-Tu</b> | Elongation factor                                | Biofilm formation                                                       |
| <b>EF-G</b>  | Elongation factor                                | Biofilm formation                                                       |
| <b>rcsB</b>  |                                                  | Biofilm formation                                                       |
| <b>acsA</b>  |                                                  | Biofilm formation                                                       |
| <b>YfmO</b>  | Efflux protein                                   | Resistance to MLSB antibiotics                                          |
| <b>cse3</b>  | CRISPR-associated endoribonuclease Cse4          | CRISPR-Cas systems                                                      |
| <b>casC</b>  | CRISPR system Cascade subunit CasC               | CRISPR-Cas systems                                                      |
| <b>cas3</b>  | CRISPR-associated nuclease/helicase Cas3         | CRISPR-Cas systems                                                      |
| <b>fucA</b>  | L-fucose phosphate aldolase                      | Pathogenesis                                                            |

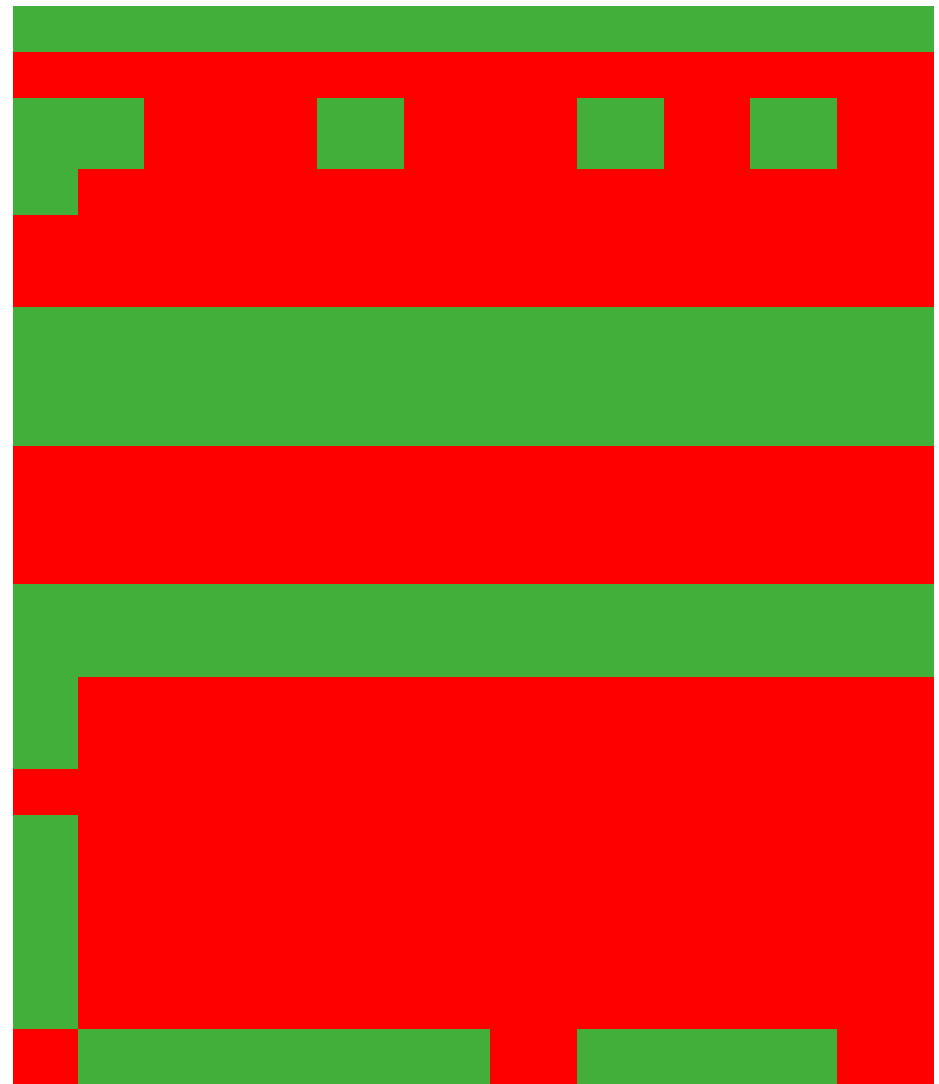

| Gene          | Protein                                 | Function                                                                                                                                                                       | Phylogenetic Group |
|---------------|-----------------------------------------|--------------------------------------------------------------------------------------------------------------------------------------------------------------------------------|--------------------|
| <b>MprA</b>   | Response regulator MprA                 | contributes to maintaining a balance among several systems involved in stress resistance and is required for establishment and maintenance of persistent infection in the host | Proteobacteria     |
| <b>LiaR</b>   | Transcriptional regulatory protein LiaR | cell envelope stress response                                                                                                                                                  | Proteobacteria     |
| <b>luxS_2</b> | S-ribosylhomocysteine lyase             | methionine metabolism and quorum sensing                                                                                                                                       | Proteobacteria     |
| <b>mprA_1</b> | Response regulator MprA                 | maintenance of persistent infection                                                                                                                                            | Proteobacteria     |
| <b>qacA</b>   | Antiseptic resistance protein           | Resistance                                                                                                                                                                     | Proteobacteria     |

Note: Green color refers to the identification of the gene, while red refers to the absence of the gene.
